# Supplementary material
Source: HighWire-hosted journal article supplement (https://mcr.aacrjournals.org/content/suppl/2012/07/13/1541-7786.MCR-12-0331)

**Fig. S5**

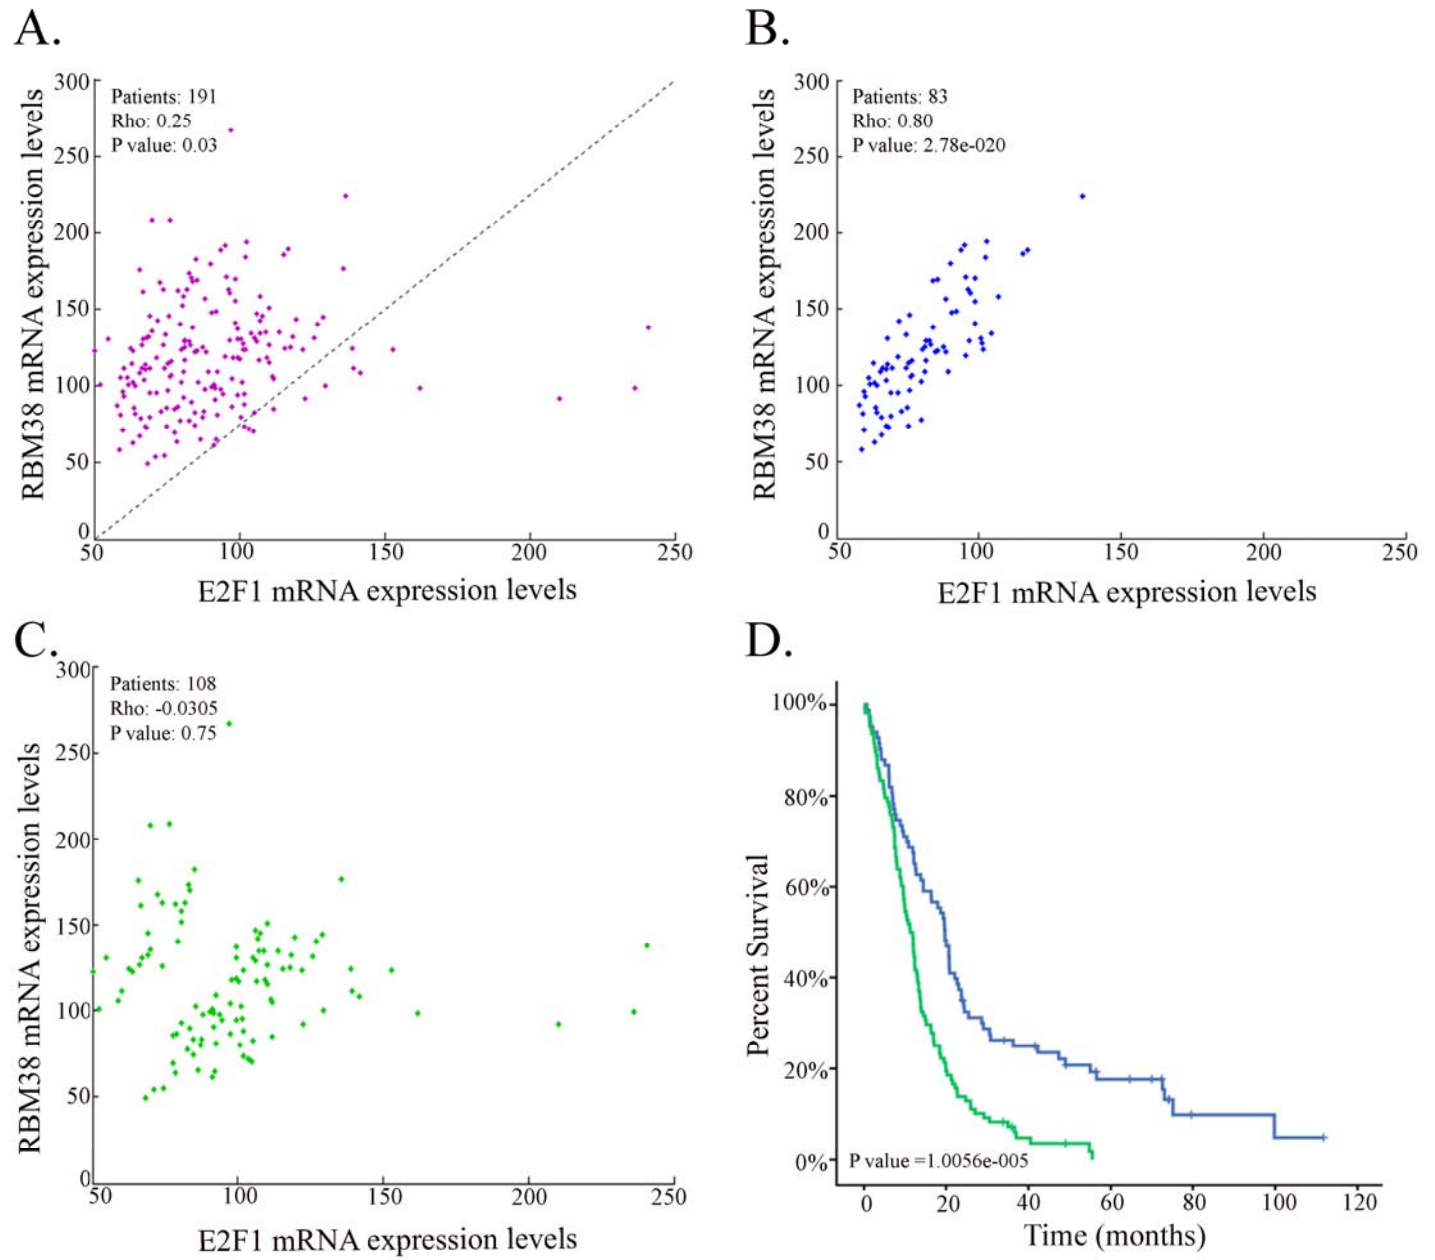

Supplement: F5_118K.pdf [file F5_118K.pdf]
